1 **Title**

2 An experimental feasibility study evaluating the adequacy of sportswear-type wearables  
3 for recording physical exercise intensity

4

5 **Authors**

6 Yoshihiro Marutani<sup>1,2</sup>, Shoji Konda<sup>2,3</sup>, Issei Ogasawara<sup>2,3</sup>, Keita Yamasaki<sup>2</sup>, Teruki  
7 Yokoyama<sup>2</sup>, Etsuko Maeshima<sup>1</sup>, Ken Nakata<sup>2</sup>

8

9 **Author's affiliations**

- 10 1. Graduate School of Sport Science, Osaka University of Health and Sport Sciences,  
11 Kumatori, Osaka, Japan, 590-0496
- 12 2. Department of Health and Sport Sciences, Osaka University Graduate School of  
13 Medicine, Toyonaka, Osaka, Japan, 560-0043
- 14 3. Department of Sports Medical Biomechanics, Osaka University Graduate School of  
15 Medicine, Suita, Osaka, Japan, 565-0871

16

17 **Corresponding authors**

18 Ken Nakata, M.D, Ph.D., Department of Health and Sport Sciences, Osaka University  
19 Graduate School of Medicine, Toyonaka, Osaka, Japan, 560-0043  
20 Phone: +81-6210-8439, Email: ken.nakata@hss.osaka-u.ac.jp

21

22 Shoji Konda, Ph.D., Department of Health and Sport Sciences, Osaka University  
23 Graduate School of Medicine, Toyonaka, Osaka, Japan, 560-0043  
24 Phone: +81-6850-6036, Email: skonda@caos.med.osaka-u.ac.jp

25 **Abstract**

26 Sportswear-type wearables with integrated inertial sensors and electrocardiogram (ECG)  
27 electrodes, have been developed. We examined the feasibility of using sportswear-type  
28 wearables to evaluate exercise intensity within a controlled laboratory setting. Six male  
29 college athletes were asked to wear a sportswear-type wearable while performing a  
30 treadmill test that reached up to 20 km/h. The magnitude of the filtered tri-axial  
31 acceleration signal, recorded by the inertial sensor, was used to calculate the acceleration  
32 index. The R-R intervals of ECG were used to determine heart rate; the external validity  
33 of the heart rate was then evaluated according to oxygen uptake, which is the gold  
34 standard physiological exercise intensity. Single regression analyses between treadmill  
35 speed and the acceleration index in each participant showed that the slope of the  
36 regression line was significantly greater than zero with a high coefficient of determination  
37 (walking, 0.95; jogging, 0.96; running, 0.90). Another single regression analyses between  
38 heart rate and oxygen uptake showed that the slope of the regression line was significantly  
39 greater than zero, with a high coefficient of determination (0.96). Together, these results  
40 indicate that sportswear-type wearables are a feasible technology for evaluating physical  
41 and physiological exercise intensity across a wide range of physical activities and sport  
42 performances.

43

44 **Keywords:** wearable sensor, acceleration, electrocardiogram, heart rate, exercise intensity

45

46

47

48

49 **1. Introduction**

50 The benefits of wearable sensors have attracted attention worldwide. With the ability to  
51 monitor the intensity of physical activity in real time, the field of sports medicine has  
52 recognized that wearables are technically superior to conventional monitoring techniques,  
53 such as subjective questionnaires [1-4]. Wearables thus allow exercise management and  
54 training programs to be quantitatively analyzed [5-7]. Hence, most wearables today use a  
55 combination of physical and physiological indices. The former evaluates physical  
56 intensity, determined using a global positioning system (GPS) and accelerometer to  
57 quantify displacement, speed, and acceleration [8-10]. Conversely, the percentage of  
58 maximum heart rate (%HRmax), and heart rate reserve (HRR) represent physiological  
59 intensity [11, 12]. Together, these indices allow exercise intensity to be measured. Further,  
60 the effects of exercise have traditionally been measured via oxygen uptake [13]; however,  
61 this monitoring method is not suitable for non-experimental settings. As a result,  
62 alongside the rise in the use of wearables, heart rate indices – which allow non-invasive,  
63 day-to-day observations – have become the preferred monitoring method over oxygen  
64 uptake [14-16]. Therefore, in recent years, the heart rate indices have been widely used  
65 in daily life as a non-invasive method in the field of wearable sensing [14-16].

66

67 The most popular consumer wearable is the watch-type sensor worn on the wrist, which  
68 allows the physical and physiological indices of daily living, exercise, and sports activity  
69 to be recorded [17, 18]. The second most common is the chest-belt-type wearable, which  
70 has been used for research purposes and to monitor exercise intensity in competitive  
71 sports [19, 20]. Currently, athletic associations – such as the International Federation of  
72 Association Football (FIFA) and International Tennis Federation (ITF) – have introduced

73 rules allowing players to don wearables during official games. The downside, however,  
74 is that both watch- and chest-belt-type sensors cause discomfort and increase the risk of  
75 injury, for example in situations where players come into contact with each other. The  
76 development of wearables with improved comfort and lower risk of injury will enable the  
77 quantification of exercise intensity across a wide range of physical activities, from daily  
78 life to competitive sports [21, 22].

79

80 Recently, a sportswear-type wearable with a small inertial sensor attached to the chest and  
81 two ECG electrodes sewn on opposite sides, has been developed [23]. A major advantage  
82 of sportswear-type wearables is that it is as comfortable as sportswear, which enables  
83 athletes to wear them in daily training, practice and even in competitive match. A previous  
84 study had demonstrated the feasibility of recording ECG signals while running [24, 25];  
85 however, the feasibility of evaluating exercise intensity using an embedded inertial sensor  
86 is not yet known. With our study, we aimed to examine this across a wide range of  
87 physical activities, within a controlled laboratory setting.

88

## 89 **2. Methods**

### 90 **2.1 Participants**

91 Six male college athletes (mean age  $\pm$  SD:  $18.8 \pm 0.4$  years; mean height  $\pm$  SD:  $171.2 \pm$   
92  $7.1$  cm; mean weight  $\pm$  SD:  $62.2 \pm 5.5$  kg; mean BMI  $\pm$  SD:  $19.1 \pm 4.0$  kg/m<sup>2</sup>) volunteered  
93 to participate in this study. Participants included were: (1) collegiate male athletes who  
94 exercised regularly; (2) were disease-free and in good health; (3) previous experience  
95 with a treadmill; (4) ability to complete the measurement protocol. All participants also  
96 confirmed that they were not taking any medication, and refrained from drinking alcohol

97 the day before measurement. Prior to participating in the study, each volunteer provided  
98 written informed consent, and the study was approved by the Institutional Review Board  
99 (19537-2).

100

## 101 2.2 Data collection

102 Each participant was asked to wear an elastic sportswear-type wearable (MATOUS<sup>R</sup>VS,  
103 Teijin Frontier Sensing Ltd., Osaka, Japan) that is similar in comfort to exercise  
104 underwear. Prior to the experiment, the collegiate athletes confirmed that they felt no  
105 discomfort wearing it during sports activities. A data logger operating at 1000 Hz (SS-  
106 ECGHRAG, Sports Sensing Ltd, Fukuoka, Japan) was also attached to each participant's  
107 upper back. An inertial sensor was built into the data logger (Figure 1), while two ECG  
108 electrodes were located on either side of the wearable. Both the ECG and acceleration  
109 signals were recorded by the data logger and transmitted to a laptop computer. Using a  
110 respiratory gas analyzer (AE-300S AEROMONITOR, Minato Medical Science Ltd.,  
111 Tokyo, Japan), the breath-by-breath method was implemented to measure oxygen uptake  
112 ( $\dot{V}O_2$ ), which is the gold standard physiological index. This allowed us to examine the  
113 feasibility of using the heart rate obtained by the sportswear-type wearable, as an indicator  
114 of exercise intensity. A linear relationship has been reported between heart rate and  
115 oxygen uptake [17, 18]; therefore, the use of oxygen uptake which is the gold standard  
116 for evaluating physiological intensity is appropriate for a feasibility study.

117

118

119

120

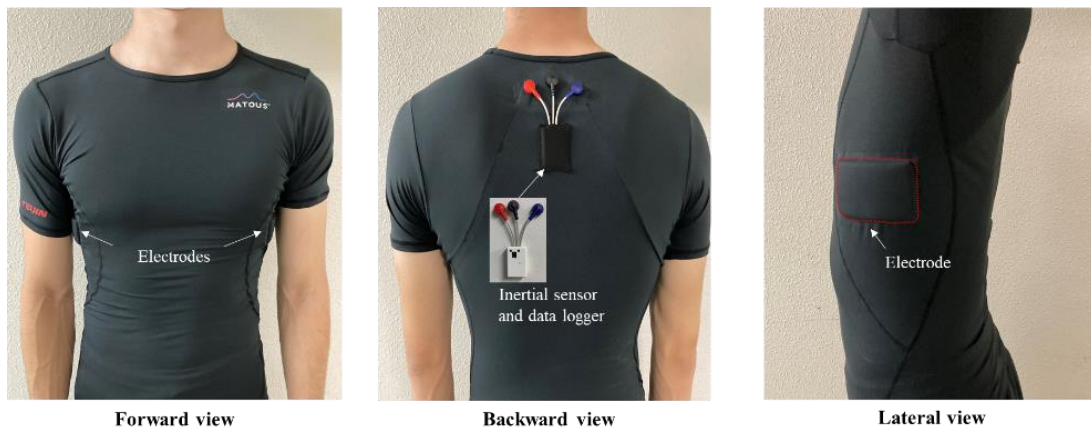

122 *Figure 1: Sportsweat-type wearable. ECG electrodes are located under each armpit, and*  
 123 *the inertial sensor embedded into the data logger is mounted on the upper back.*

124

125 A linear incremental loading test was performed using a treadmill (Elite T5000, Johnson  
 126 Health Tech Japan Ltd., Osaka, Japan) set at a zero-degree incline. After recording the  
 127 measurement at rest (standing), the participants were made to walk (1-6 km/h), jog (7-12  
 128 km/h), and run (13-20 km/h); speed was increased by 1 km/h every 30s. All measurements  
 129 were taken in an indoor laboratory. This allowed us to examine the mechanical feasibility  
 130 of evaluating the acceleration index under an exercise, intensity-controlled, condition.

131

### 132 2.3 Data analysis

133 The acceleration's x-axis, y-axis, and z-axis were measured by the inertial sensor and then  
 134 filtered by a Butterworth band-pass filter (0.5 Hz - 20 Hz), allowing the norm of  
 135 acceleration ( $|a| = \sqrt{a_x^2 + a_y^2 + a_z^2}$ ) to be calculated. Then the norm of acceleration  
 136 was filtered by a moving average filter with a 1-second window, defined as acceleration  
 137 index. Following a Butterworth high-pass filtering process with a cutoff frequency of 5  
 138 Hz, the ECG signal was also filtered using a fourth order Savitzky–Golay filter. The

139 filtered ECG data were used to detect the R-R interval and calculate the heart rate per  
140 minute (bpm). Then the calculated heart rate was filtered by a moving average filter with  
141 a 1-second window. Oxygen uptake was averaged every 30s using the respiratory gas  
142 analyzer software on the output of each breath, from rest to exercise completion. Data  
143 analysis was then performed using a custom-made MATLAB R2020a program  
144 (MathWorks, Inc.).

145

#### 146 2.4 Statistical analysis

147 Heart rate, acceleration index, and oxygen uptake during the last 15s were averaged and  
148 used as representative values for each participant within each experimental condition. The  
149 mean values and standard deviations across all participants were determined using  
150 descriptive statistics. The relationship between heart rate and oxygen uptake was  
151 determined using a single regression analysis. To examine whether the acceleration index  
152 is equivalent to a change of 1 km/h on the treadmill or if the index adequately reflects the  
153 change in exercise intensity, single regression analyses between acceleration indices and  
154 treadmill speeds were performed for each participant, for the following exercise types:  
155 low-intensity (walking: 1-6 km/h); medium-intensity (jogging: 7-12 km/h); and high-  
156 intensity (running: 13-20 km/h). A one-sample t-test was then used to check whether the  
157 slope of the regression line was significantly greater than zero.

158

### 159 **3 Results**

160 The ECG signals obtained from the sportswear-type wearable were capable of detecting  
161 the R wave, necessary for calculating the heart rate over a wide range of exercise  
162 intensities: low (walking), moderate (jogging), and high (running) (Figure 2). The

163 physiological indices (heart rate and oxygen uptake) showed linear trends with increasing  
164 treadmill speed. Similarly, the acceleration index showed linear trends for all exercise  
165 intensities (Figure 3). However, a rapid change was observed at the switching point  
166 between low-intensity exercise (walking) and moderate-intensity exercise (jogging)  
167 (Figure 3). The single regression analysis between heart rate and oxygen uptake showed  
168 that the slope of the regression line was significantly greater than zero ( $p < 0.001$ ), with  
169 a high coefficient of determination ( $R^2 = 0.96$ ) (Table 1, Figure 4). Another single  
170 regression analysis between treadmill speed and the acceleration index showed that the  
171 slope of the regression line was significantly greater than zero at all intensities ( $p < 0.001$ )  
172 (Table 1, Figure 5), with a high coefficient of determination (walking, 0.95; jogging, 0.96;  
173 running, 0.90) (Table 1).

174

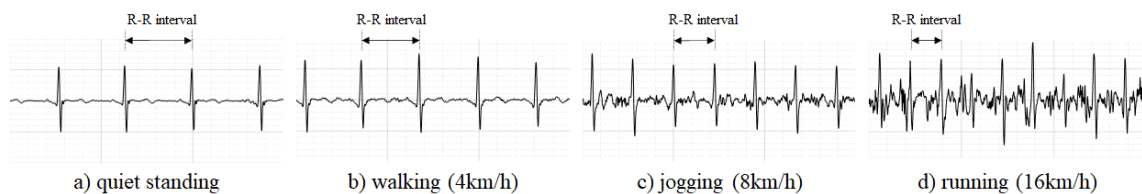

175

176

177 *Figure 2: ECG waveforms recorded by the sportswear-type wearable: (a) at rest (quiet*  
178 *standing); (b) walking; (c) jogging; and (d) running.*

179

180

181

182



183

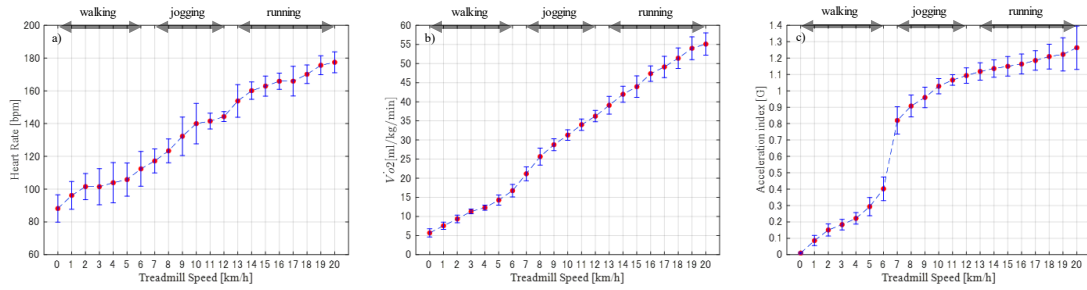

184

185 *Figure 3: Mean and standard deviation of (a) heart rate (bpm), (b) oxygen uptake ( $\dot{V}O_2$ )*  
186 *and (c) acceleration index at each treadmill speed across all participants.*

187

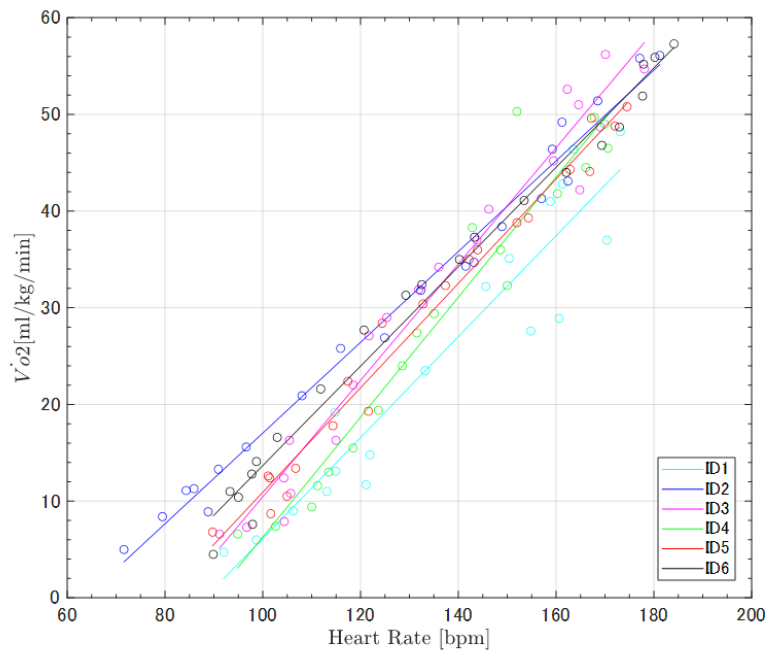

188 *Figure 4: Regression lines of the heart rate and oxygen uptake comparison of all*  
189 *participants. All participants showed a linear relationship with small variations ( $r \geq 0.96$ ).*

190

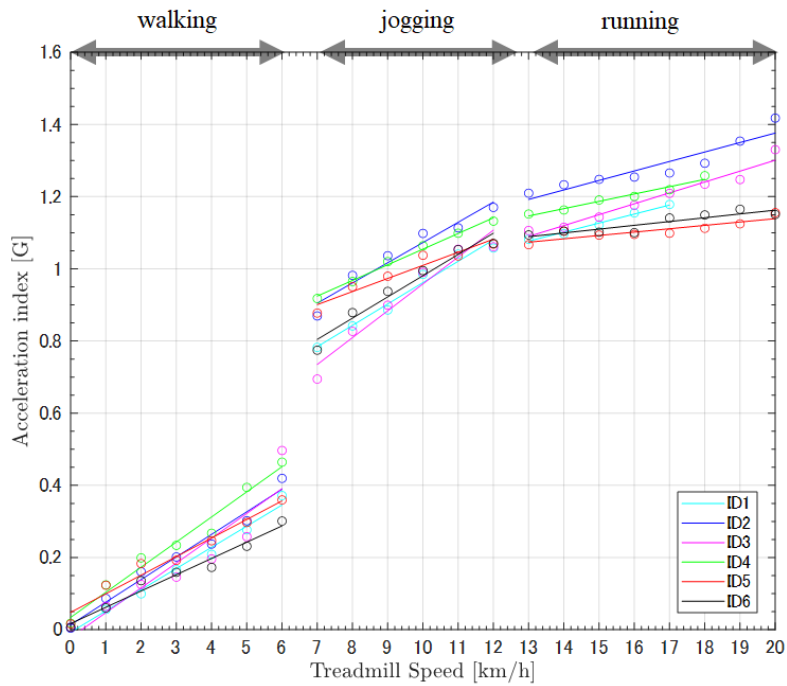

191 *Figure 5: Regression lines of the acceleration index and treadmill speed comparison of*  
 192 *all participants. All participants showed linear trends between acceleration index and*  
 193 *treadmill speed within each condition: walking (0-6 km/h); jogging (7-12 km/h); and*  
 194 *running (13-20 km/h).*

195

196 **Table 1: Slope of regression lines and coefficient of determination**

|                                                              | acceleration index  |                     |                     | bpm and $\dot{V}O_2$ |
|--------------------------------------------------------------|---------------------|---------------------|---------------------|----------------------|
|                                                              | walking             | jogging             | running             |                      |
| slope of regression line                                     | 0.06<br>(0.05-0.07) | 0.06<br>(0.04-0.08) | 0.02<br>(0.01-0.03) | 0.54<br>(0.47-0.62)  |
| coefficient of determination<br>of regression line ( $R^2$ ) | 0.95<br>(0.86-0.99) | 0.96<br>(0.93-0.99) | 0.90<br>(0.77-0.99) | 0.96<br>(0.90-0.99)  |

197

198

199

200

#### 201 **4. Discussion**

202 We examined the feasibility of evaluating exercise intensity across wide range of physical  
203 activity (quiet standing, walking, jogging, and running), using a sportswear-type wearable  
204 in a controlled laboratory setting. The results of this study demonstrated that (1) the heart  
205 rate recorded by the sportswear-type wearable highly correlated with the oxygen uptake  
206 and (2) the acceleration index systematically increased alongside the rise in exercise  
207 intensity. We suggest that it is feasible to use sportswear-type wearables to evaluate  
208 exercise intensity across different physical activities.

209

210 The sportswear-type wearable allows the detection of R-R intervals on the recorded ECG  
211 waveforms during quiet standing, walking, jogging, and running (Figure 2). This suggests  
212 that heart rate can be determined from the sportswear-type wearable, and bpm is an  
213 appropriate physiological indicator of exercise intensity across activities. The signal-to-  
214 noise ratio decreases with the increase in artifacts during moderate to high intensity  
215 movements, such as jogging and running (Figure 2). The artifacts may be a result of the  
216 wearable's motion artifact and contaminated muscle activity. Recently, wearable sensors  
217 have been used to predict and detect cardiac diseases [26]. With the current accuracy of  
218 ECG measurements by the sportswear-type wearable, it is not suitable to detect  
219 arrhythmia during high intensity exercise. However, it is assumed that it may be possible  
220 at rest and low intensity exercise. In future studies, it is necessary to develop sportswear-  
221 type wearable that can detect arrhythmia during high intensity exercise and sports  
222 activities.

223

224 ECG-derived heart rate demonstrated a positive trend with increasing exercise intensity

225 (Figure 3 and 4). Although the validity of the ECG recording could not be evaluated by  
226 comparing its results with other ECG recording devices, the strong association between  
227 heart rate and oxygen uptake identified in this experiment indicates that the heart rate  
228 obtained from the sportswear-type wearable is adequate for evaluating physiological  
229 intensity. Indeed, prior studies have also reported a linear relationship between heart rate  
230 and oxygen uptake [27, 28], reinforcing the validity of the heart rate recorded by our  
231 sportswear-type wearable. Validation studies on the heart rate determined via optical  
232 watch-type wearable devices have reported low accuracy during activity with varying  
233 intensity [29]. This suggests that it is difficult to use watch-type wearables in competitive  
234 sports that involve intense activity. Currently, the sportswear-type wearables demonstrate  
235 an acceptable level of accuracy for detecting R-R intervals, indicating that the calculated  
236 heart rate has corresponding accuracy. The sportswear-type wearable could thus be  
237 applied to quantify physiological intensity during sports of wide-ranging intensities, from  
238 rest to high intensity.

239

240 The linear association between the acceleration index and controlled treadmill speeds  
241 (walking, jogging, and running) (Figure 3 and 5) demonstrates that the acceleration index  
242 recorded by the wearable's inertial sensor is adequate for detecting changes in physical  
243 intensity. A previous study had reported a change in acceleration index when going up to  
244 a speed of 16.5 km/h; conversely, our experiment's participants reached a greater speed  
245 (up to 20 km/h), which is common to many sports activities. In a previous study, the rapid  
246 change of acceleration index during the transition from walking to jogging was recorded  
247 by both the inertial sensor located on the upper back, and the wearable's sensor on the  
248 lower back [30]. The regression line's slope was smaller during the running condition

249 than during walking and jogging. This demonstrates that the sensitivity of the acceleration  
250 index relative to the change in activity intensity may slightly decrease when the athlete  
251 reaches running and sprinting intensity. However, the slope of the regression line was  
252 significantly greater than zero; therefore, the results suggest that the acceleration index  
253 recorded by the inertial sensor located on the upper back is useful for the evaluation of  
254 varied intensity in sports activities. GPS-recorded moving velocity has been widely used  
255 as an indicator of exercise intensity during competitive sports, especially team sports [30-  
256 32]. However, GPS validation studies have reported that the technology's reliability and  
257 accuracy significantly reduce when individuals move fast over short distances, regardless  
258 of sampling frequency [33-35]. In addition, GPS devices are relatively large and heavy  
259 when compared with the accelerometers. Therefore, the small and light accelerometer on  
260 the upper back not only demonstrates feasibility for detecting fast-moving activity over a  
261 short distance, but also causes less discomfort, making the wearable device adequate for  
262 competitive sports.

263

264 This study had two major limitations. First, we could not directly compare ECG results  
265 between those obtained from the sportswear-type wearable and the ground truth measure.  
266 Instead, we verified the feasibility of heart rate as an indicator of physiological intensity  
267 by external comparison with oxygen uptake. In future studies, direct comparisons of ECG  
268 records will provide results that better indicate the possibility for using sportswear-type  
269 wearables to detect abnormal ECGs derived from cardiovascular disease. Second, this  
270 study only tested a sportswear-type wearable designed for men. However, if a sportswear-  
271 type wearable designed for women adopts the same structural locations for the ECG  
272 electrodes and inertial sensor, we believe that a similar study to ours with female

273 participants will also demonstrate feasibility for evaluating exercise intensity.

274

## 275 **5. Conclusion**

276 The major advantage of sportswear-type wearables is that it is as comfortable as  
277 sportswear, which enables athletes to wear them even in competitive sports. We  
278 demonstrated that a sportswear-type wearable, with two integrated ECG electrodes and  
279 an inertial sensor, is adequate for evaluating exercise intensity across physical activities  
280 that range from rest to high intensity. It suggests the sportswear-type wearable is thus  
281 suitable for the monitoring of physical and physiological exercise intensity during various  
282 exercise types and sports activities. The sportswear-type wearables will be used as  
283 assistive devices to ensure sport-related safety and improve athletic performance.

284

## 285 **Funding**

286 This work was partially supported by Sports Research Innovation Project (SRIP) grant  
287 sponsored by the Japan Sports Agency and MEXT "Innovation Platform for Society 5.0"  
288 Program.

289

290

## 291 **Author contribution**

292 Conceptualization, Y.M., I.O., E.M., and K.N.; Data acquisition, Y.M.; Data analysis, Y.M,  
293 S.K., and I.O.; Interpretation, Y.M., I.O., K.Y., T.Y., E.M., and K.N. Writing original draft,  
294 Y.M., S.K. I.O. All authors critically revised the report, commented on drafts of the  
295 manuscript, and approved the final report.

296

297 **Institutional Review Board Statement**

298 The study was conducted in accordance with the guidelines of the Declaration of Helsinki  
299 and approved by the Institutional Ethics Committee of Osaka University Hospital (19537-  
300 2, July 1, 2020).

301

302 **Informed Consent Statement**

303 All volunteers provided written informed consent.

304

305 **Data Availability Statement**

306 The data analyzed in this manuscript will be made available from the corresponding  
307 author upon reasonable request.

308

309 **Acknowledgements**

310 Not applicable

311

312 **Conflicts of Interest**

313 The authors declare no conflict of interest.

314

315 **References**

- 316 1. Aroganam, G.; Manivannan, N.; Harrison, D., Review on Wearable Technology  
317 Sensors Used in Consumer Sport Applications. *Sensors (Basel)* 2019, 19, (9),  
318 1983, doi:10.3390/s19091983.
- 319 2. Iqbal, M. H.; Aydin, A.; Brunckhorst, O.; Dasgupta, P.; Ahmed, K., A Review of  
320 Wearable Technology in Medicine. *J R Soc Med* 2016, 109, (10), 372-380,

- 321 doi:10.1177/0141076816663560.
- 322 3. Camomilla, V.; Bergamini, E.; Fantozzi, S.; Vannozzi, G., Trends Supporting the  
323 in-Field Use of Wearable Inertial Sensors for Sport Performance Evaluation: A  
324 Systematic Review. *Sensors (Basel)* 2018, 18, (3), 873, doi:10.3390/s18030873.
- 325 4. Patel, M. S.; Asch, D. A.; Volpp, K. G., Wearable Devices as Facilitators, Not  
326 Drivers, of Health Behavior Change. *JAMA* 2015, 313, (5), 459-460,  
327 doi:10.1001/jama.2014.14781.
- 328 5. Cross, M. J.; Williams, S.; Trewartha, G.; Kemp, S. P.; Stokes, K. A., The  
329 Influence of in-Season Training Loads on Injury Risk in Professional Rugby  
330 Union. *Int J Sports Physiol Perform* 2016, 11, (3), 350-355,  
331 doi:10.1123/ijsp.2015-0187.
- 332 6. Duggan, J. D.; Moody, J. A.; Byrne, P. J.; Cooper, S. M.; Ryan, L., Training Load  
333 Monitoring Considerations for Female Gaelic Team Sports: From Theory to  
334 Practice. *Sports (Basel)* 2021, 9, (6), 84, doi:10.3390/sports9060084.
- 335 7. Esmaeili, A.; Stewart, A. M.; Hopkins, W. G.; Elias, G. P.; Lazarus, B. H.; Rowell,  
336 A. E.; Aughey, R. J., Normal Variability of Weekly Musculoskeletal Screening  
337 Scores and the Influence of Training Load Across an Australian Football League  
338 Season. *Front Physiol* 2018, 9, 144, doi:10.3389/fphys.2018.00144.
- 339 8. Gómez-Carmona, C. D.; Bastida-Castillo, A.; Ibáñez, S. J.; Pino-Ortega, J.,  
340 Accelerometry as a Method for External Workload Monitoring in Invasion Team  
341 Sports. A Systematic Review. *PLOS ONE* 2020, 15, (8), e0236643,  
342 doi:10.1371/journal.pone.0236643.
- 343 9. Harper, D. J.; Carling, C.; Kiely, J., High-Intensity Acceleration and Deceleration  
344 Demands in Elite Team Sports Competitive Match Play: A Systematic Review and



- 345           Meta-Analysis of Observational Studies. *Sports Med* 2019, 49, (12), 1923-1947,  
346           doi:10.1007/s40279-019-01170-1.
- 347   10.   Nicolella, D. P.; Torres-Ronda, L.; Saylor, K. J.; Schelling, X., Validity and  
348           Reliability of an Accelerometer-Based Player Tracking Device. *PLOS ONE* 2018,  
349           13, (2), e0191823, doi:10.1371/journal.pone.0191823.
- 350   11.   Cardinale, M.; Varley, M. C., Wearable Training-Monitoring Technology:  
351           Applications, Challenges, and Opportunities. *Int J Sports Physiol Perform* 2017,  
352           12, (Suppl 2), S255-S262, doi:10.1123/ijsp.2016-0423.
- 353   12.   Schneider, C.; Hanakam, F.; Wiewelhove, T.; Doweling, A.; Kellmann, M.; Meyer,  
354           T.; Pfeiffer, M.; Ferrauti, A., Heart Rate Monitoring in Team Sports-A Conceptual  
355           Framework for Contextualizing Heart Rate Measures for Training and Recovery  
356           Prescription. *Front Physiol* 2018, 9, 639, doi:10.3389/fphys.2018.00639.
- 357   13.   Andrews, R. B., Net Heart Rate as a Substitute for Respiratory Calorimetry. *Am*  
358           *J Clin Nutr* 1971, 24, (9), 1139-1147, doi:10.1093/ajcn/24.9.1139.
- 359   14.   Bonomi, A. G.; Ten Hoor, G. A.; de Morree, H. M.; Plasqui, G.; Sartor, F.,  
360           Cardiorespiratory Fitness Estimation From Heart Rate and Body Movement in  
361           Daily Life. *J Appl Physiol* (1985) 2020, 128, (3), 493-500,  
362           doi:10.1152/jappphysiol.00631.2019.
- 363   15.   Bot, S. D. M.; Hollander, A. P., The Relationship Between Heart Rate and Oxygen  
364           Uptake During Non-Steady State Exercise. *Ergonomics* 2000, 43, (10), 1578-  
365           1592, doi:10.1080/001401300750004005.
- 366   16.   Chow, H. W.; Yang, C. C., Accuracy of Optical Heart Rate Sensing Technology in  
367           Wearable Fitness Trackers for Young and Older Adults: Validation and  
368           Comparison Study. *JMIR MHealth UHealth* 2020, 8, (4), e14707,

- 369 doi:10.2196/14707.
- 370 17. Lee, J. M.; Kim, Y.; Welk, G. J., Validity of Consumer-Based Physical Activity  
371 Monitors. *Med Sci Sports Exerc* 2014, 46, (9), 1840-1848,  
372 doi:10.1249/MSS.0000000000000287.
- 373 18. Sushames, A.; Edwards, A.; Thompson, F.; McDermott, R.; Gebel, K., Validity  
374 and Reliability of Fitbit Flex for Step Count, Moderate to Vigorous Physical  
375 Activity and Activity Energy Expenditure. *PLOS ONE* 2016, 11, (9), e0161224,  
376 doi:10.1371/journal.pone.0161224.
- 377 19. Achten, J.; Jeukendrup, A. E., Heart Rate Monitoring: Applications and  
378 Limitations. *Sports Med* 2003, 33, (7), 517-538, doi:10.2165/00007256-  
379 200333070-00004.
- 380 20. Lutz, J.; Memmert, D.; Raabe, D.; Dornberger, R.; Donath, L., Wearables for  
381 Integrative Performance and Tactic Analyses: Opportunities, Challenges, and  
382 Future Directions. *Int J Environ Res Public Health* 2020, 17, (1), 59,  
383 doi:10.3390/ijerph17010059.
- 384 21. Nakanishi, M.; Izumi, S.; Nagayoshi, S.; Kawaguchi, H.; Yoshimoto, M.; Shiga,  
385 T.; Ando, T.; Nakae, S.; Usui, C.; Aoyama, T.; Tanaka, S., Estimating Metabolic  
386 Equivalentents for Activities in Daily Life Using Acceleration and Heart Rate in  
387 Wearable Devices. *Biomed Eng OnLine* 2018, 17, (1), 100, doi:10.1186/s12938-  
388 018-0532-2.
- 389 22. Bayoumy, K.; Gaber, M.; Elshafeey, A.; Mhaimed, O.; Dineen, E. H.; Marvel, F.  
390 A.; Martin, S. S.; Muse, E. D.; Turakhia, M. P.; Tarakji, K. G.; Elshazly, M. B.,  
391 Smart Wearable Devices in Cardiovascular Care: Where We Are and How to  
392 Move Forward. *Nat Rev Cardiol* 2021, 18, (8), 581-599, doi:10.1038/s41569-021-

- 393 00522-7.
- 394 23. An, X.; Stylios, G. K., A Hybrid Textile Electrode for Electrocardiogram (ECG)  
395 Measurement and Motion Tracking. *Materials (Basel)* 2018, 11, (10), 1887,  
396 doi:10.3390/ma11101887.
- 397 24. Arquilla, K.; Webb, A. K.; Anderson, A. P., Textile Electrocardiogram (ECG)  
398 Electrodes for Wearable Health Monitoring. *Sensors (Basel)* 2020, 20, (4), 1013,  
399 doi:10.3390/s20041013.
- 400 25. Singhal, A.; Cowie, M. R., The Role of Wearables in Heart Failure. *Curr Heart*  
401 *Fail Rep* 2020, 17, (4), 125-132, doi:10.1007/s11897-020-00467-x.
- 402 26. Schantz, P.; Salier Eriksson, J.; Rosdahl, H., The Heart Rate Method for  
403 Estimating Oxygen Uptake: Analyses of Reproducibility Using a Range of Heart  
404 Rates From Commuter Walking. *Eur J Appl Physiol* 2019, 119, (11-12), 2655-  
405 2671, doi:10.1007/s00421-019-04236-0.
- 406 27. Colosio AL, Pedrinolla A, Da Lozzo G, Pogliaghi S. Heart Rate-Index Estimates  
407 Oxygen Uptake, Energy Expenditure and Aerobic Fitness in Rugby Players. *J*  
408 *Sports Sci Med.* 2018 ,17, (4), 633-639.
- 409 28. Bent, B.; Goldstein, B. A.; Kibbe, W. A.; Dunn, J. P., Investigating Sources of  
410 Inaccuracy in Wearable Optical Heart Rate Sensors. *NPJ Digit Med* 2020, 3, 18,  
411 doi:10.1038/s41746-020-0226-6.
- 412 29. Fudge, B. W.; Wilson, J.; Easton, C.; Irwin, L.; Clark, J.; Haddow, O.; Kayser, B.;  
413 Pitsiladis, Y. P., Estimation of Oxygen Uptake During Fast Running Using  
414 Accelerometry and Heart Rate. *Med Sci Sports Exerc* 2007, 39, (1), 192-198,  
415 doi:10.1249/01.mss.0000235884.71487.21.
- 416 30. De Brabandere, A.; Op De Beéck, T.; Schütte, K. H.; Meert, W.; Vanwanseele, B.;

- 417 Davis, J., Data Fusion of Body-Worn Accelerometers and Heart Rate to Predict  
418 VO<sub>2</sub>max During Submaximal Running. PLOS ONE 2018, 13, (6), e0199509,  
419 doi:10.1371/journal.pone.0199509.
- 420 31. Carling, C.; Bloomfield, J.; Nelsen, L.; Reilly, T., The Role of Motion Analysis in  
421 Elite Soccer: Contemporary Performance Measurement Techniques and Work  
422 Rate Data. Sports Med 2008, 38, (10), 839-862, doi:10.2165/00007256-  
423 200838100-00004.
- 424 32. Seshadri, D. R.; Li, R. T.; Voos, J. E.; Rowbottom, J. R.; Alfes, C. M.; Zorman, C.  
425 A.; Drummond, C. K., Wearable Sensors for Monitoring the Internal and External  
426 Workload of the Athlete. NPJ Digit Med 2019, 2, 71, doi:10.1038/s41746-019-  
427 0149-2.
- 428 33. Coutts, A. J.; Duffield, R., Validity and Reliability of GPS Devices for Measuring  
429 Movement Demands of Team Sports. J Sci Med Sport 2010, 13, (1), 133-135,  
430 doi:10.1016/j.jsams.2008.09.015.
- 431 34. Hausler, J.; Halaki, M.; Orr, R., Application of Global Positioning System and  
432 Microsensor Technology in Competitive Rugby League Match-Play: A  
433 Systematic Review and Meta-Analysis. Sports Med 2016, 46, (4), 559-588,  
434 doi:10.1007/s40279-015-0440-6.
- 435 35. Teixeira, J. E.; Forte, P.; Ferraz, R.; Leal, M.; Ribeiro, J.; Silva, A. J.; Barbosa,  
436 T. M.; Monteiro, A. M., Monitoring Accumulated Training and Match Load  
437 in Football: A Systematic Review. Int J Environ Res Public Health 2021, 18, (8),  
438 3906, doi:10.3390/ijerph18083906.
